# Supplementary material for: Auditory Steady-State Responses in Schizophrenia: An Updated Meta-Analysis
Source: MDPI journal article supplement (doi:10.3390/brainsci13121722), 2023-12-16
Supplement: s1 [file s1]

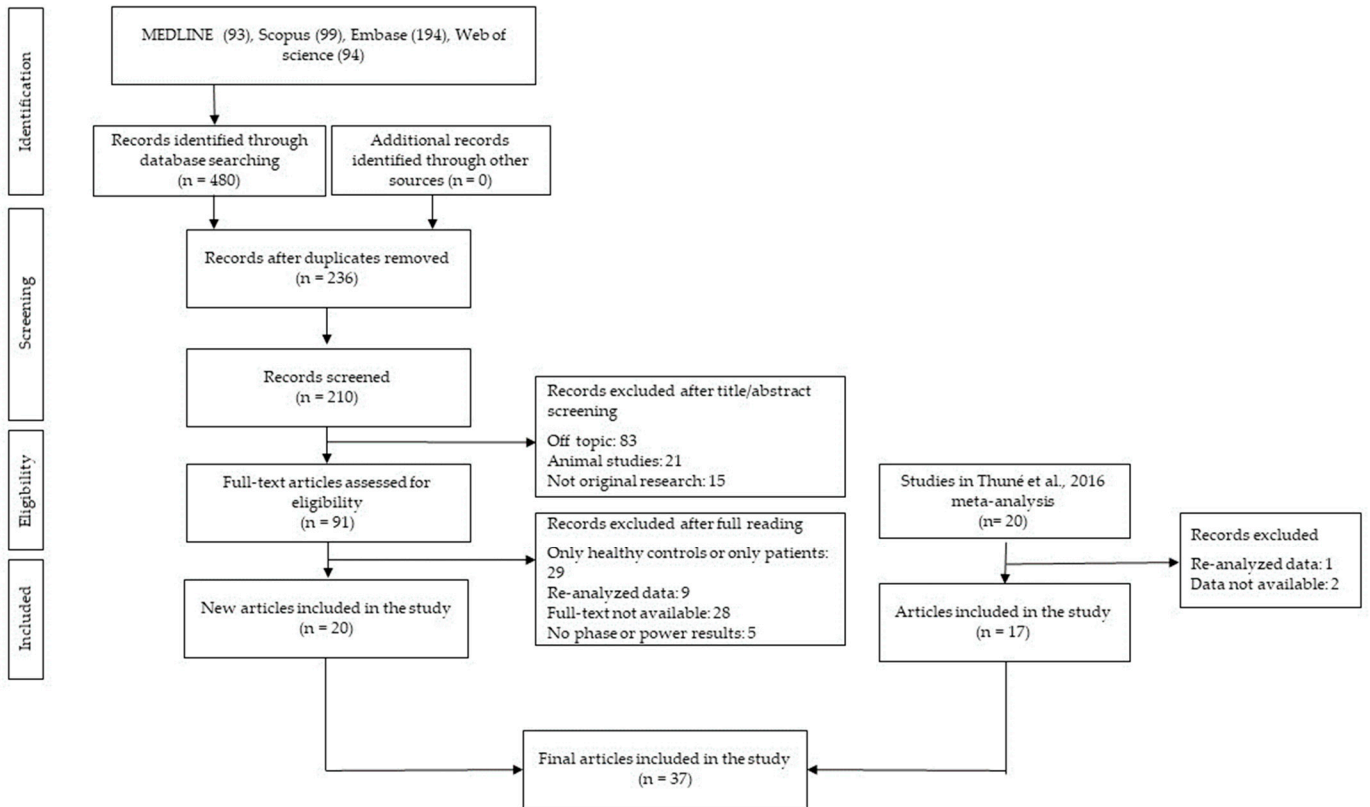

**Supplementary Figure S1.** PRISMA Flow Diagram depicting the systematic selection process of studies for inclusion in our analysis.

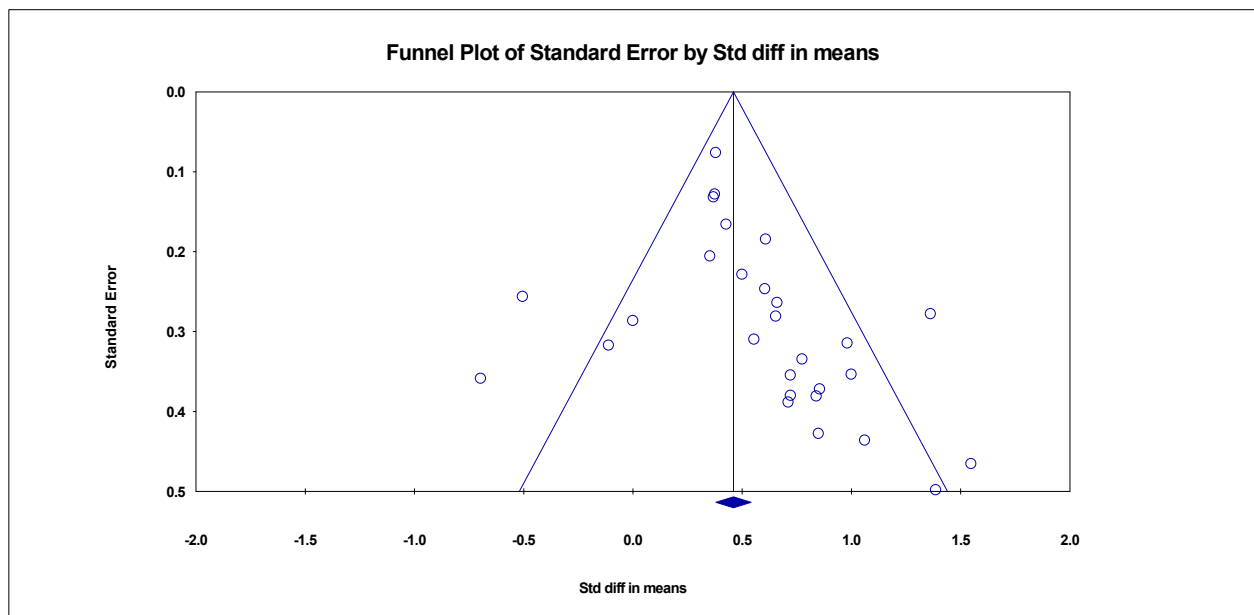

**Supplementary Figure S2-**Funnel Plot of Standard Error (vertical axis) versus Standardized Difference in Means (horizontal axis) for the power component of 40 Hz Auditory Steady-State Responses: The scatter distribution assesses potential publication bias and methodological variance.

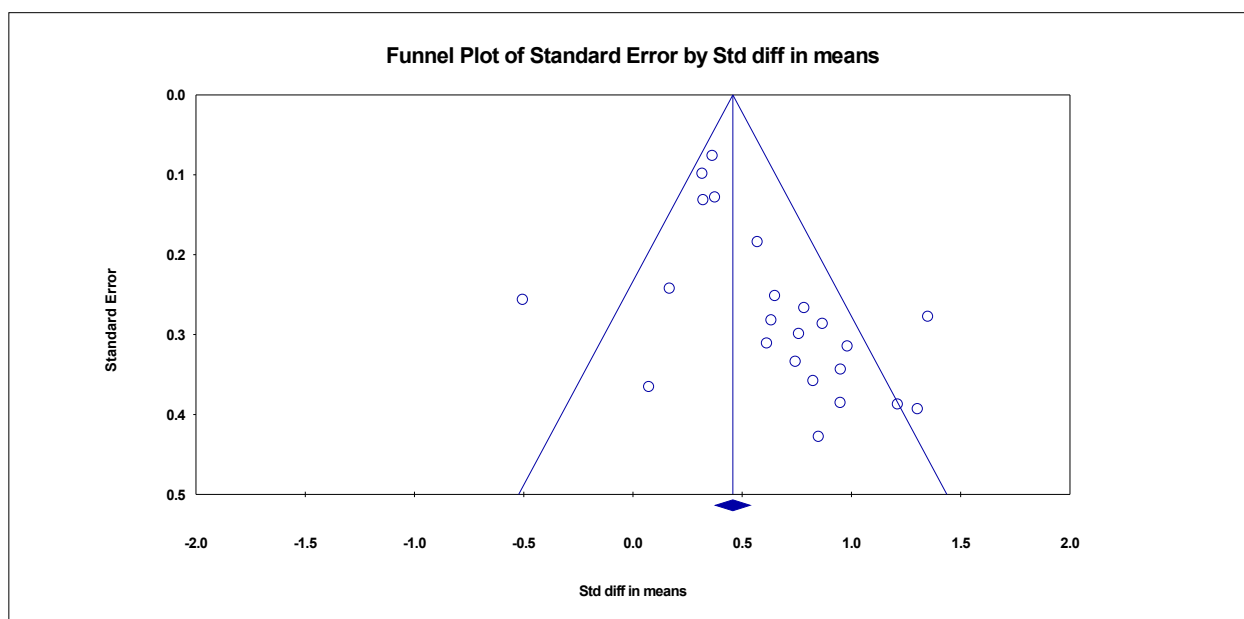

**Supplementary Figure S3.** Funnel Plot of Standard Error (vertical axis) versus Standardized Difference in Means (horizontal axis) for the phase component of 40 Hz Auditory Steady-State Responses.

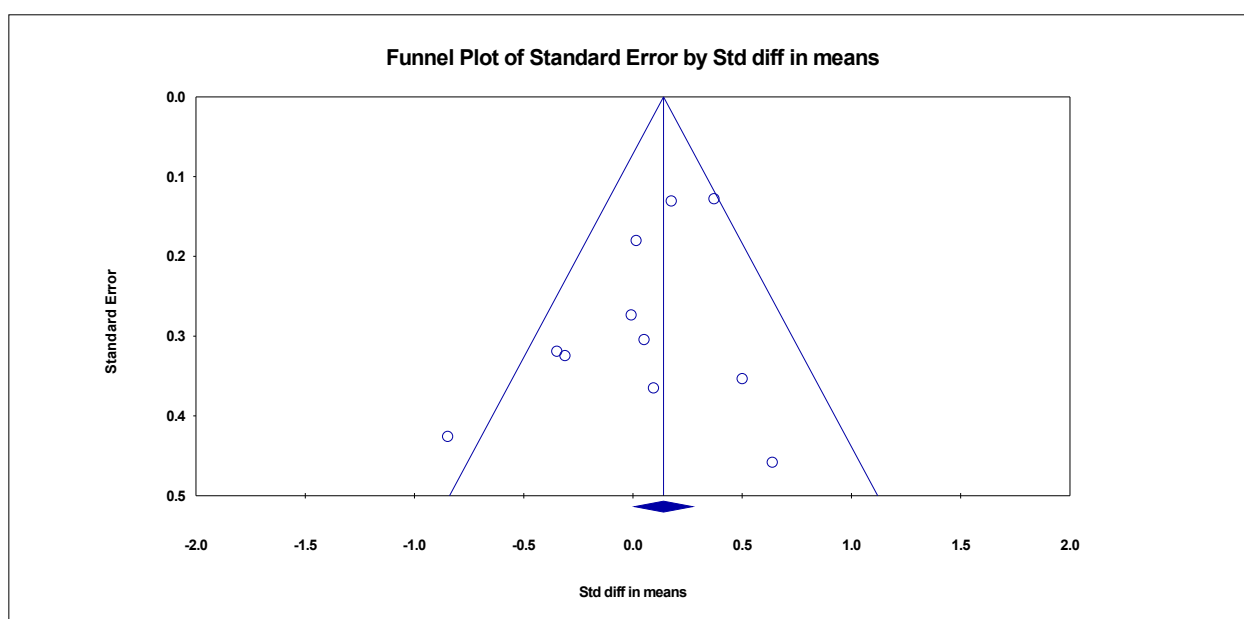

**Supplementary Figure S4.** Funnel Plot of Standard Error (vertical axis) versus Standardized Difference in Means (horizontal axis) for studies on the power component of beta oscillations in Auditory Steady-State Responses.

**Supplementary Table S1.** Participants characteristics across studies.

| Authors                            | Patient group | N controls | N patients*          | % males patients*    | Mean age (y) controls | Mean age (y) patients*   | Illness duration (y): Mean (SD)* | CPZ (mg/day): Mean (SD)*       | Positive symptoms**<br>Mean (SD)* | Negative symptoms**<br>Mean (SD)* |
|------------------------------------|---------------|------------|----------------------|----------------------|-----------------------|--------------------------|----------------------------------|--------------------------------|-----------------------------------|-----------------------------------|
| Kwon et al., 1999 [32]             | SCZ           | 15         | 15                   | 100                  | 44.6                  | 43.3                     | 21.1 (7.1)                       | 440.1 (261.6)                  | 17.1 (6.9)                        | 18.1 (7)                          |
| Hong et al., 2004 [33]             | SCZ, AR       | 17         | SCZ = 24<br>AR = 11  | SCZ = 58<br>AR = 55  | 41.1                  | SCZ = 39.7<br>AR = 44.4  |                                  | 348.7 (150.45)                 |                                   |                                   |
| Spencer et al., 2008 [34]          | FEP           | 33         | FEP = 16             | FEP = 58             | 27.5                  | FEP = 25.5               |                                  | FEP = 338 (196)                | FEP = 20.9 (4.5)                  | FEP = 17.8 (5.5)                  |
| Vierling-claasen et al., 2008 [35] | SCZ           | 12         | 12                   | 100                  |                       |                          | 26.2 (8.2)                       |                                |                                   |                                   |
| Teale et al., 2008 [36]            | SCZ           | 15         | 15                   | 87                   | 34.8                  | 37.9                     | 12.6 (7.6)                       | 499                            |                                   |                                   |
| Wilson et al., 2008 [37]           | FEP           | 10         | FEP = 10             | FEP = 70             | 15.8                  | FEP = 14.6               | 3.44 (2.97)                      |                                |                                   |                                   |
| Spencer et al., 2009 [38]          | SCZ           | 16         | 18                   | 100                  | 44.4                  | 39.8                     | 13.7 (8)                         | 450 (306)                      | 13.5 (12.3)                       | 11.8 (8.8)                        |
| Hamm et al., 2011 [39]             | SCZ           | 18         | 18                   | 89                   | 39.7                  | 40.7                     | 18.2                             | 207.2                          | 19.5                              | 13.9                              |
| Tsuchimoto et al., 2011 [40]       | SCZ           | 22         | 17                   | 35                   | 37                    | 35.6                     | 13.5 (7.5)                       | 541 (367)                      | 13.1 (12.6)                       | 15.8 (8.8)                        |
| Hamm et al., 2012 [41]             | SCZ           | 16         | 17                   | 65                   | 39.5                  | 41.5                     | 18.2 (7.88)                      | 355 (245)                      |                                   |                                   |
| Kömek et al., 2012 [42]            | SCZ           | 12         | 12                   | 58                   | 31.4                  | 30.3                     |                                  |                                |                                   |                                   |
| Rass et al., 2012 [43]             | SCZ, AR       | 56         | SCZ = 42<br>AR = 35  | SCZ = 55<br>FEP = 37 | 38.75                 | SCZ = 36.9<br>AR = 36    |                                  |                                |                                   |                                   |
| Kirihara et al., 2012 [44]         | SCZ           | 188        | 234                  | 78                   | 43.9                  | 44.5                     | 22.7 (9.9)                       |                                | 13.4 (12.2)                       | 11.7 (8.6)                        |
| Roach et al., 2013 [45]            | SCZ           | 25         | 28                   | 75                   | 36.1                  | 39.3                     |                                  |                                | 15.4 (5)                          | 14.3 (5.2)                        |
| Edgar et al., 2014 [46]            | SCZ           | 29         | 39                   | 85                   | 37.9                  | 40.9                     |                                  |                                | 17.8                              | 15.8                              |
| Hirano et al., 2015 [47]           | SCZ           | 24         | 24                   | 83                   | 44.1                  | 46                       | 21.1 (9.7)                       | 426.39 (444.03)                |                                   |                                   |
| Hamm et al., 2015 [20]             | SCZ           | 18         | 18                   | 50                   | 40.8                  | 45.6                     |                                  | 207                            | 13.7                              | 14.8                              |
| Griskova-Bulanova, 2016 [48]       | SCZ           | 25         | 26                   | 65                   | 35.2                  | 39.5                     |                                  | 424.1 (358.82)                 | 21.62 (6.28)                      | 20.23(7.24)                       |
| Alegre, 2017 [49]                  | SCZ, FEP      | 13         | SCZ = 17<br>FEP = 11 | SCZ = 41<br>FEP = 64 | 27.6                  | SCZ = 38.5<br>FEP = 32.6 | 2 (10.29)                        | SCZ = 562.5 (380.7)<br>FEP = 0 |                                   |                                   |
| Light, 2017 [50]                   | SCZ           | 14         | 18                   | 61                   | 26.6                  | 37.2                     | 21.18                            | 586.73 (122.43)                | 17.6 (1.1)                        | 17.4 (1.9)                        |
| Edgar, 2018 [51]                   | SCZ           | 55         | 41                   | 80                   | 39.6                  | 40.3                     |                                  |                                | 17.1                              | 15.1                              |

|                              |             |     |                      |                       |      |                            |                                     |                          |                                        |                                     |
|------------------------------|-------------|-----|----------------------|-----------------------|------|----------------------------|-------------------------------------|--------------------------|----------------------------------------|-------------------------------------|
| Griskova-Bulanova, 2018 [52] | SCZ         | 20  | 26                   | 100                   | 38   | 42                         | 17 (12)                             | 692.23<br>(310.38)       | 21.8 (5.9)                             | 28.8 (5.6)                          |
| Koshiyama, 2018 [31]         | FEP, AR     | 30  | FEP = 34<br>AR = 28  | FEP = 100<br>AR = 81  | 22   | FEP = 23.9<br>AR = 21.4    | 1.15 (1.04)                         | FEP = 529<br>(385)       | FEP = 14.7<br>(5.3)                    | FEP = 18.7<br>(5.7)                 |
| Puvvada, 2018 [53]           | SCZ, AR     | 108 | SCZ = 128<br>AR = 55 | SCZ = 67<br>AR = 31   | 37.9 | SCZ =<br>37.8<br>AR = 46.6 |                                     |                          |                                        |                                     |
| Sun, 2018 [54]               | SCZ         | 30  | 24                   | 54                    | 34.2 | 33                         | 9.06 (9.18)                         | 514.7<br>(246.4)         | 20.6 (6.3)                             | 23.9 (6.8)                          |
| Wang, 2018 [55]              | FEP         | 28  | FEP = 33             | FEP = 42              | 26.1 | FEP = 24.7                 | 0.41 (0.41)                         | FEP = 193.36<br>(129.16) | FEP = 20.7<br>(3.7)                    | FEP = 15.9<br>(4.9)                 |
| Zhou, 2018 [56]              | SCZ         | 75  | 52                   | 21                    | 38.9 | 42.7                       | 19 (8.3)                            | 590.2<br>(560.7)         | 17 (6.7)                               | 18 (8.9)                            |
| Bartolomeo, 2019 [57]        | FEP         | 19  | FEP = 34             | FEP = 71              | 22.9 | FEP = 22                   | 2.01 (1.33)                         | FEP = 139.6<br>(173)     | FEP = 16.9<br>(6.5)                    | FEP = 12.7<br>(5.6)                 |
| Kim, 2019 [58]               | SCZ         | 30  | 33                   | 48                    | 43.3 | 42.2                       | 13.57 (8.9)                         | 495.06<br>(558.53)       | 13.1 (6.6)                             | 16.5 (6.2)                          |
| Parker, 2019 [59]            | SCZ         | 137 | 113                  | 55                    | 41.7 | 39                         |                                     | 580 (851)                | 18.3 (6.6)                             | 18.8 (7.2)                          |
| Lepock, 2020 [60]            | AR          | 22  | AR = 36              | AR = 67               | 21.7 | AR = 21.3                  |                                     |                          |                                        |                                     |
| Murphy, 2020 [61]            | SCZ,<br>FEP | 17  | SCZ = 16<br>FEP = 12 | SCZ = 81<br>FEP = 100 | 28.8 | SCZ = 33.6<br>FEP = 27.5   | SCZ = 11.5 (6.4)<br>FEP = 2.6 (5.8) |                          | SCZ = 13.4 (12.1)<br>FEP = 12.5 (11.8) | SCZ = 10.0 (8.6)<br>FEP = 9.3 (8.5) |
| Grent-'t-Jong, 2021 [62]     | FEP, AR     | 49  | FEP = 33<br>AR = 116 | FEP = 67<br>AR = 29   | 23   | FEP = 24<br>AR = 22        |                                     |                          | FEP = 20 (8)                           | FEP = 16 (9.2)                      |
| Koshiyama, 2021 [63]         | SCZ         | 294 | 433                  | 69                    | 43.7 | 45.5                       | 23.9 (10.9)                         |                          |                                        | 11.5 (8.7)                          |
| Coffman, 2022 [64]           | FEP         | 32  | FEP = 25             | FEP = 84              | 24   | FEP = 24                   |                                     | FEP = 199.2<br>(154.9)   | FEP = 20.1 (5)                         | FEP = 18.7 (5.9)                    |
| Du, 2023 [65]                | SCZ         | 85  | 66                   | 67                    | 35.6 | 33.9                       |                                     | 573 (548)                |                                        |                                     |
| Ogyu, 2023 [66]              | SCZ         | 25  | 54                   | 52                    | 40.2 | 41                         | 17.3 (12)                           | 681.75<br>(461.75)       | 18.25 (3.65)                           | 20.15 (5.95)                        |

\*: values for SCZ group when not specified

\*\*: as measured with the Positive and Negative Syndrome Scale

SCZ = chronic schizophrenia, FEP = First episode psychosis, AR = at-risk, y = in years, SD = Standard Deviation, CPZ = Chlorpromazine dosage equivalent
